# Supplementary material for: Label-free fluorescent immunoassay for Cu2+ ion detection based on UV degradation of immunocomplex and metal ion chelates
Source: Royal Society of Chemistry journal article supplement (doi:10.1039/c7nr04087c), 2017-01-01
Supplement: c7nr04087c1.pdf [file c7nr04087c1.pdf]

## Electronic supplementary information

# Label-free fluorescent immunoassay for $\text{Cu}^{2+}$ ions detection based on UV degradation of immunocomplex and metal ion chelates

Qi Shu, Mengli Liu, Hui Ouyang, and Zhifeng Fu\*

## Table of Contents

Materials and instruments

Procedure of  $\text{Cu}^{2+}$  ions detection using label-free FIA

ELISA tests for sixteen cations chelates

Fig. S1

Fig. S2

Fig. S3

Table S1

Notes and references

## Materials and instruments

CuSO<sub>4</sub>, FeSO<sub>4</sub>, MgSO<sub>4</sub>, AgNO<sub>3</sub>, CoCO<sub>3</sub>, MnCl<sub>2</sub>, PbCl<sub>2</sub>, NaCl, CrCl<sub>3</sub>, NH<sub>4</sub>Cl, CdCl<sub>2</sub>, HgCl<sub>2</sub>, AlCl<sub>3</sub>, FeCl<sub>3</sub>, ZnCl<sub>2</sub>, CuCl, EDTA, NaOH, HNO<sub>3</sub> and HClO<sub>4</sub> were all purchased from Chengdu Kelong Chemical Reagent (China). CdSe/ZnS QDs were products of Shanghai Xingzi Material Co., Ltd. (China). Bovine serum albumin (BSA) was purchased from Gibco (USA). Cu<sup>2+</sup>-EDTA-BSA conjugate and mouse anti Cu<sup>2+</sup>-EDTA McAb were purchased from Wuxi Determine Bio-Tech Co., Ltd. (China). Horseradish peroxidase (HRP) was supplied by Beijing Biosynthesis Biotechnology Co., Ltd. (China). Mouse anti Cu<sup>2+</sup>-EDTA McAb-HRP conjugate was home-prepared by a reported glutaraldehyde protocol<sup>1</sup>. *Ganoderma* and *American ginseng* were purchased from local pharmacy. Lake water was collected from Gongqingtuan Lake in Southwest University campus. SuperBlock® T20 used for microplate blocking was provided by Thermo Fisher Scientific Inc. (USA). Carbonate buffer saline (0.05 M, pH 9.0) was used as the coating buffer for immobilizing antigen and antibody on microplate. PBS at 0.01 M and pH 7.4 containing 4.0 mM EDTA was used to dilute and chelate Cu<sup>2+</sup> ions. CdSe/ZnS QDs were diluted by 0.01 M PBS at pH 9.5. PBS (0.01 M, pH 7.4) containing 0.05% Tween-20 was adopted as washing buffer. The digestion solution for *Ganoderma* and *American ginseng* was a mixture of concentrated HNO<sub>3</sub> and concentrated HClO<sub>4</sub> (v/v = 4:1). All other reagents were analytical reagent grade and used without further purification. Polystyrene high-affinity 96-well microplate was obtained from Greiner Bio-One (Germany).

An UV camera obscura (ZF-20D) provided by Shanghai Guanghao Instrument Co.,

Ltd. (China) was used to provide UV radiation with a power of 40 W and a wavelength of 254 nm. An ELGA PURELAB classic system (France) was adopted to prepare ultra-pure water (18.2MΩ) used in the whole work. A TAS-990G atomic absorption spectrometer (Beijing Purkinje General Instrument Co., Ltd., China) was used to provide reference values for  $\text{Cu}^{2+}$  ions detection. An Infinite 200 PRO multifunctional microplate reader (Tecan, Austria) was adopted to detect FL signals.

### **Procedure of $\text{Cu}^{2+}$ ions detection using label-free FIA**

The microplate was coated with 10  $\mu\text{g/mL}$  mouse anti  $\text{Cu}^{2+}$ -EDTA McAb dissolved in the coating buffer (100  $\mu\text{L/well}$ ) overnight at 4 °C. Next it was washed thrice with 300  $\mu\text{L}$  of the washing buffer and blocked using 150  $\mu\text{L}$  of the blocking buffer for 90 min at 37 °C. After thrice washing, 100  $\mu\text{L}$  of sample solution containing  $\text{Cu}^{2+}$ -EDTA chelates was injected into the microplate and allowed to react for 90 min at 37°C. After thrice washing for removing unbound  $\text{Cu}^{2+}$ -EDTA chelates, the microplate was exposed to UV radiation for 2 h to release free  $\text{Cu}^{2+}$  ions. Then 100  $\mu\text{L}$  of CdSe/ZnS QDs at 5  $\mu\text{g/mL}$  was injected into the microplate. After 10 min, the FL signal was collected to quantify the concentration of  $\text{Cu}^{2+}$  ions.

### **ELISA tests for sixteen cations chelates**

The microplate was coated with 10  $\mu\text{g/mL}$   $\text{Cu}^{2+}$ -EDTA-BSA conjugate dissolved in the coating buffer (100  $\mu\text{L/well}$ ) overnight at 4 °C. Next it was washed thrice with 300  $\mu\text{L}$  of the washing buffer and blocked using 150  $\mu\text{L}$  of the blocking buffer for 90 min at 37 °C. After thrice washing, the microplate was filled with 50  $\mu\text{L}$  of mouse anti

$\text{Cu}^{2+}$ -EDTA McAb-HRP conjugate and the same volume of cations chelates solution (cations concentration 250 ng/mL). After 90-min incubation at 37 °C, the microplate was washed thrice to remove the unbound reactants. Lastly a standard TMB color reaction was conducted to measure the absorbance value.

(A)

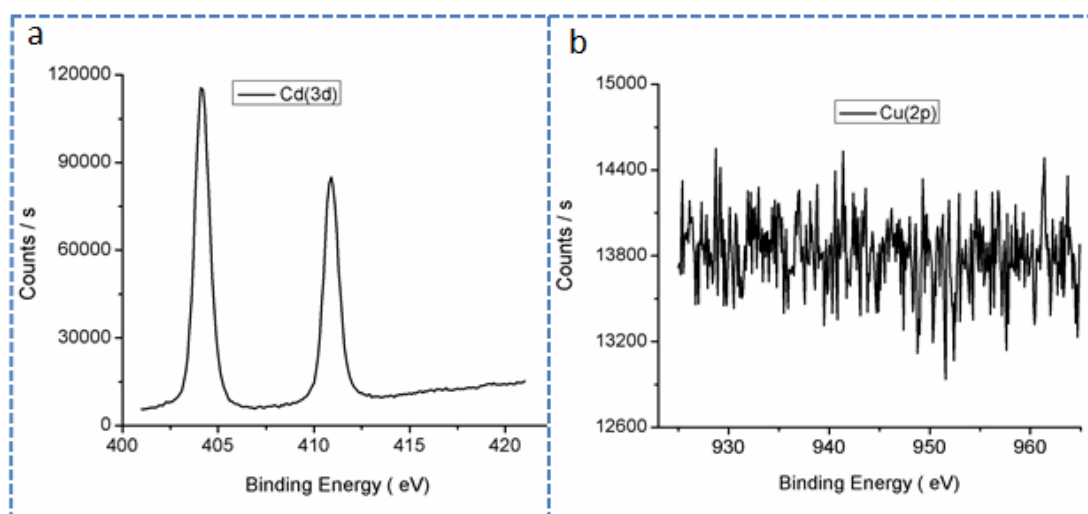

(B)

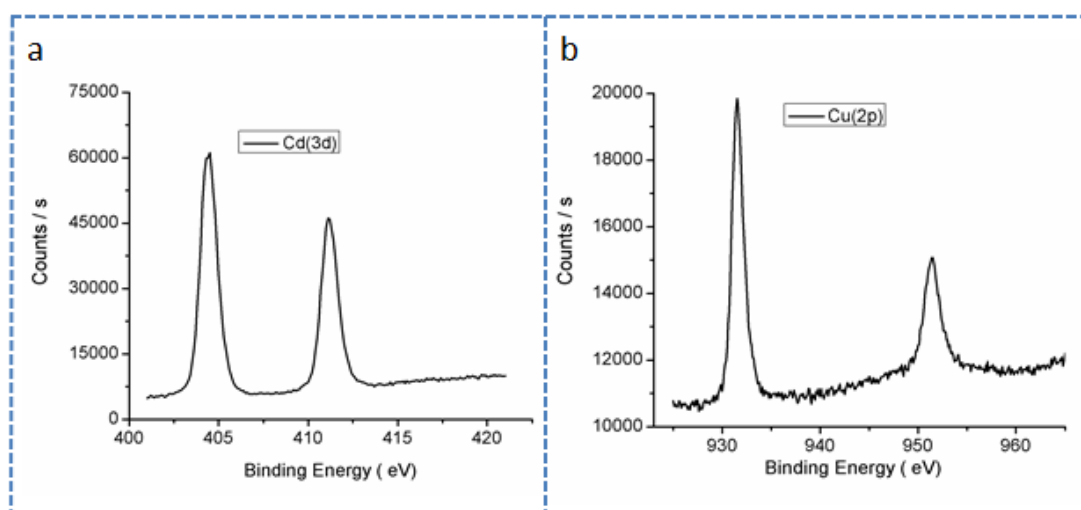

**Fig. S1** (A) XPS spectra of Cd (a) and Cu (b) of untreated QDs. (B) XPS spectra of Cd (a) and Cu (b) of QDs reacted with  $\text{Cu}^{2+}$  ions.

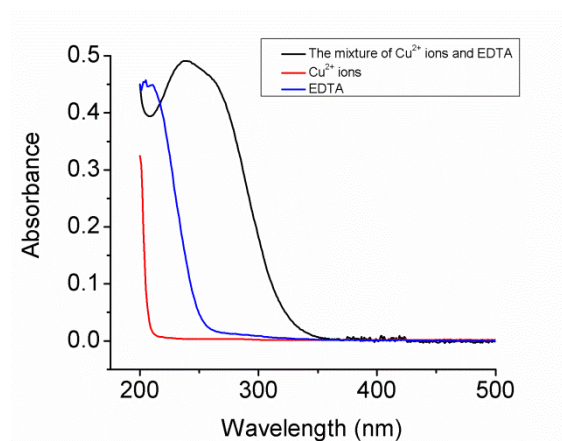

**Fig. S2** The UV absorbance spectra of Cu<sup>2+</sup> ions, EDTA and the mixture of Cu<sup>2+</sup> ions and EDTA.

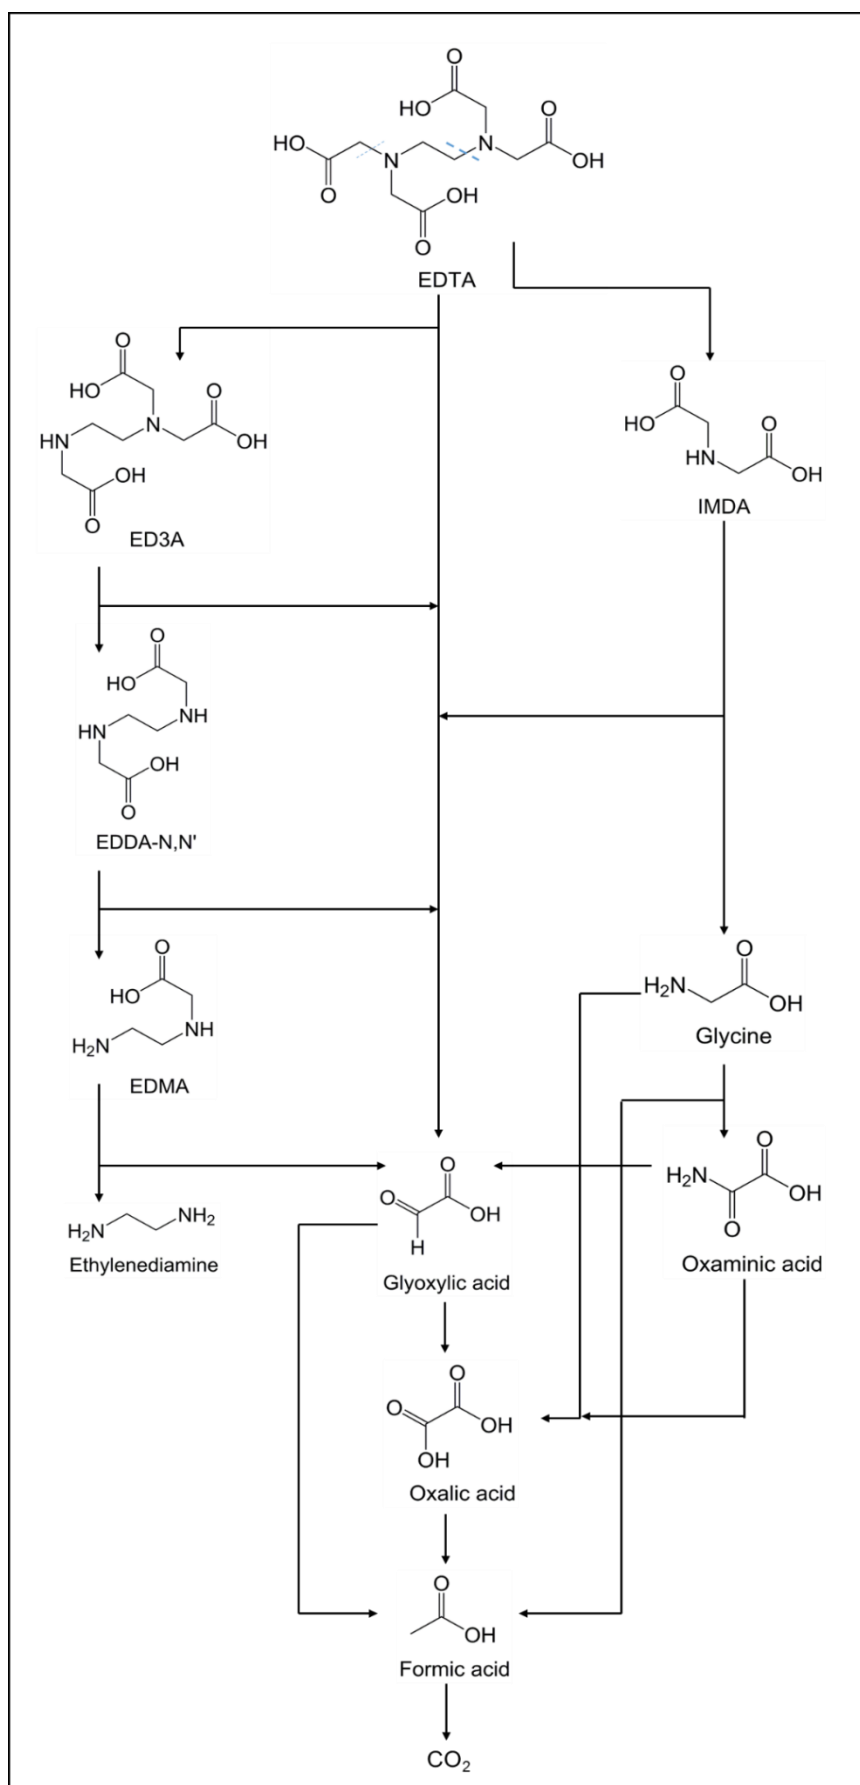

**Fig. S3** The degradation mechanism of EDTA under UV exposure.

**Table S1. Comparison of the proposed method and some typical reported methods.**

| Techniques                                              | Sophisticated instrument | Specificity | Throughput | References      |
|---------------------------------------------------------|--------------------------|-------------|------------|-----------------|
| Atomic absorption spectrometry                          | Required                 | High        | Low        | 4               |
| Inductively coupled plasma mass spectroscopy            | Required                 | High        | Low        | 5               |
| Inductively coupled plasma atomic emission spectrometry | Required                 | High        | Low        | 6               |
| X-ray fluorescence spectrometry                         | Required                 | High        | Low        | 7               |
| Electrochemical sensor                                  | Not required             | medium      | High       | 9               |
| Label-free fluorescent immunoassay                      | Not required             | High        | High       | Proposed method |



## Notes and references

- 1 X. M. Wang, F. Q. Liu, Q. Shao, Z. R. Yin, L. M. Wang, Z. F. Fu, *Anal. Methods*, 2017, **9**, 2403.
